# 1 **The lockdown of Hubei Province causing different transmission** 2 **dynamics of the novel coronavirus (2019-nCoV) in Wuhan and** 3 **Beijing**

4 Xinhai Li<sup>1,2\*</sup>, Xumao Zhao<sup>3\*</sup>, Yuehua Sun<sup>1,2</sup>

5 <sup>1</sup> Key Laboratory of Animal Ecology and Conservation Biology, Institute of Zoology,  
6 Chinese Academy of Sciences, Beijing, 100101, China

7 <sup>2</sup> University of Chinese Academy of Sciences, Yuquan Road, Beijing 100049, China

8 <sup>3</sup> State Key Laboratory of Grassland Agro-Ecosystem/Institute of Innovation Ecology,  
9 Lanzhou University, Lanzhou, 730020, China

10 \*The authors have the same contribution to the manuscript.

11 Correspondence to: [sunyh@ioz.ac.cn](mailto:sunyh@ioz.ac.cn); [lixh@ioz.ac.cn](mailto:lixh@ioz.ac.cn)

## 12 **Abstract**

13 After the outbreak of novel coronavirus (2019-nCoV) starting in late 2019, a number  
14 of researchers have reported the predicted the virus transmission dynamics. However,  
15 under the strict control policy the novel coronavirus does not spread naturally outside  
16 Hubei Province, and none of the prediction closes to the real situation. We used the  
17 traditional SEIR model, fully estimated the effect of control measures, to predict the  
18 virus transmission in Wuhan, the capital city of Hubei Province, and Beijing. We  
19 forecast that the outbreak of 2019-nCoV would reach its peak around  $March\ 10 \pm 20$   
20 in Wuhan and  $March\ 31 \pm 16$  in Beijing, respectively. The infectious population in  
21 Beijing would be much less (only 0.3%) than those in Wuhan at the peak of this  
22 transmission wave. The unprecedented province lockdown substantially suspends the  
23 national and global outbreak of 2019-nCoV.

24 **Key words:** city closure, quarantine, pandemic, public health, SEIR model,  
25 transmission

## 26 **1. Introduction**

27 A novel coronavirus (2019-nCoV) appeared in December 2019 in Wuhan, Hubei  
28 Province in central China had triggered city closure on Jan. 23, 2020, and lockdown  
29 of all major cities in the province a few days later (Fig. 1). At present, over 50 million  
30 people are constrained locally. Due to the threat of 2019-nCoV to public health, World  
31 Health Organization (WHO) declared novel coronavirus (2019-nCoV) outbreak to be

32 “public health emergency of international concern” on Jan. 30, 2020 (Kupferschmidt  
33 2020a)

34 It is always a great challenge to fight effectively against a pandemic (Shetty  
35 2009; Van Kerkhove et al. 2010), especially when little is known about the new virus  
36 (Kamigaki & Oshitani 2010). Ideally, governments, communities and medical  
37 services take rapid, effective, rational, and proportionate responses to such health  
38 emergencies; either minimalist or maximalist responses may potentially be very  
39 harmful (Doyle et al. 2006; Tarantola et al. 2009).

40 To facilitate decision making against the 2019-nCoV, researchers had predicted  
41 the transmission dynamics in different scenarios. Read et al. (2020) estimated that  
42 only 5.1% (95% CI, 4.8–5.5) of infections in Wuhan were identified; ahead of 14  
43 days, they predicted the number of infected people in Wuhan to be greater than 250  
44 thousand on Feb. 4, 2020. Read et al. (2020) suggested, before the city closure of  
45 Wuhan, that travel restrictions from and to Wuhan city are unlikely to be effective and  
46 2019-nCoV would outbreak in Beijing, Shanghai, etc. with much larger sizes. Leung  
47 et al. (2020) estimated the transmission dynamics of 2019-nCoV in six major cities in  
48 China under six scenarios: 0%, 25%, 50% transmission reduction with and without  
49 50% mobility reduction. However, the assumption of 50% mobility reduction is much  
50 lower than the real situation. China government enforced tourism ban on Jan. 24, and  
51 carried out other control measures such as extending holidays, closing schools,  
52 cancelling meetings, suggesting a 14-day quarantine after travel. In particular,  
53 highway traffic control is strictly implemented in many cities, towns, and villages.  
54 The majority of communities in large cities such as Beijing and Shanghai have closed  
55 to visitors.

56 Under the circumstance of strict control measures, we forecast the transmission  
57 dynamics of Wuhan and Beijing. Wuhan is the source of 2019-nCoV, suffered a long  
58 history (two months) of virus transmission, with lack of medical resources to  
59 quarantine exposed and suspect people. Beijing is a larger city with 22 million  
60 residents, including 10 million inbound passengers after the holidays of Chinese New  
61 Year. We believe our estimation is close to the real situation and is helpful for 2019-  
62 nCoV control.

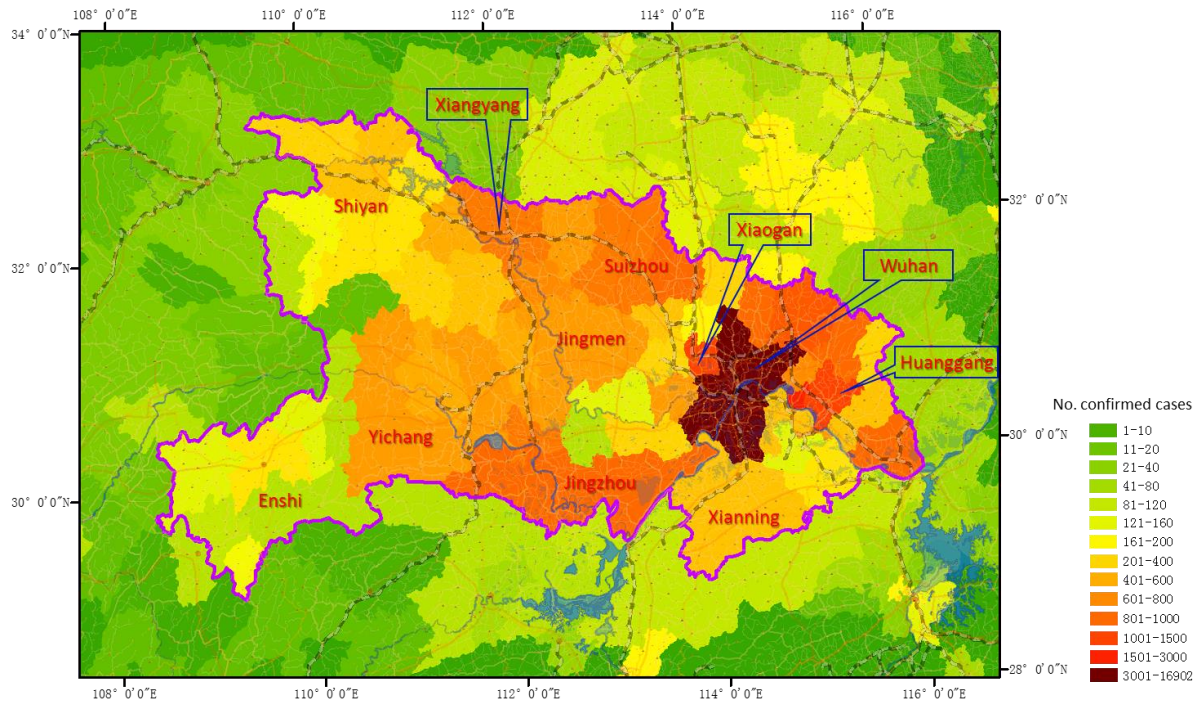

63 Fig. 1 Lockdown of Hubei Province to enclose novel coronavirus (2019-nCoV). The  
 64 gradient color represents the number of confirmed cases in Hubei Province and adjacent  
 65 areas on Feb. 9 (24:00), 2020.

## 66 2. Methods

67 We used the Susceptible-Exposed-Infectious-Recovered (SEIR) model to estimate the  
 68 dynamics of the novel coronavirus (2019-nCoV).

### 69 2.1. The SEIR Model

70 The SEIR model has the form (Hethcote 2000):

$$\begin{aligned}
 \frac{dS}{dt} &= -\beta \frac{I}{N} S \\
 \frac{dE}{dt} &= \beta \frac{I}{N} S - \alpha E \\
 \frac{dI}{dt} &= \alpha E - \nu I \\
 \frac{dR}{dt} &= \nu I
 \end{aligned}
 \tag{Equation 1}$$

71 where  $S$  is the susceptible population,  $E$  is the exposed population,  $I$  is the infectious  
 72 population,  $R$  is the recovered population,  $t$  is time (the number of days after the

73 emergence of the first case),  $N$  is the total population,  $\beta$  is the average number of  
74 infected individuals per infectious subject per unit time,  $\alpha$  is the reciprocal of average  
75 latent period,  $\nu$  is the rate of recovery (reciprocal of duration of the infection).

76 We assumed the infection rate of the novel coronavirus decreased when  
77 temperature goes up starting from March 1, 2020, since other viruses have a seasonal  
78 pattern (wave), such as the 2009 H1N1 pandemic (Fang et al. 2012). As such, we  
79 defined the decreasing infection rate exponentially as below:

$$\beta_t = \beta \times (1 - C)^{t-90} \text{ (Equation 2)}$$

80 where  $\beta_t$  is the infect rate at the time  $t$  (the first day,  $t = 1$ , is Dec. 1, 2019, based on  
81 the first confirmation of 2019-nCoV on Dec. 8);  $C$  is a constant (simulated at 0.01-  
82 0.1) defining the decreasing rate of transmission per day.

83 For the cities with continuous imported infected people, we modify the growth  
84 rate of infectious population as:

$$\frac{dI}{dt} = \alpha E - \nu I + \text{imported} \text{ (Equation 3)}$$

86 where *imported* is the daily number of imported infections.

## 87 2.2. Determination of Model Parameters

88 The basic reproductive number  $R_0$  for 2019-nCoV had been estimated in several  
89 independent studies (Table 1). It was noticed that changes in reporting rate of  
90 confirmed cases substantially affected  $R_0$  estimation (Zhao et al. 2020). In fact,  $R_0$  is  
91 highly associated with the intensity of control measures. We used a series values of  $R_0$   
92 to fit the number of cases in Wuhan and Beijing.

93 Table 1. The estimated basic reproductive number  $R_0$  for 2019-nCoV

| $R_0$ | Lower CI | Upper CI | CV   | Citations           |
|-------|----------|----------|------|---------------------|
| 3.8   | 3.6      | 4.0      | 0.05 | (Read et al. 2020)  |
| 2.68  | 2.47     | 2.86     | 0.07 | (Leung et al. 2020) |
| 2.24  | 1.96     | 2.55     | 0.13 | (Zhao et al. 2020)  |
| 3.58  | 2.89     | 4.39     | 0.20 | (Zhao et al. 2020)  |
| 2.90  | 2.32     | 3.63     | 0.22 | (Liu et al. 2020)   |
| 2.92  | 2.28     | 3.67     | 0.23 | (Liu et al. 2020)   |
| 6.47  | 5.71     | 7.23     | 0.12 | (Tang et al. 2020)  |

94 The mean value of  $R_0$  in Table 1 is 3.51, and the mean CV (coefficient of  
95 variation) is 0.15.

96 The incubation period ( $1/\alpha$  in SEIR model) was estimated as 6.4 (95% CI: 5.6 -  
97 7.7) days, ranging from 2.1 to 11.1 days (Backer et al. 2020). Liu et al. (2020)  
98 provided a lower value, 4.8 days, for the period. Based on information from other  
99 coronavirus diseases, such as SARS and MERS, the incubation period of 2019-nCoV  
100 could be up to 14 days (WHO 2020). We used 6 days as the incubation period for our  
101 simulation.

102 Other model parameters are: population size of Beijing and Wuhan are 22  
103 million and 10 million, respectively, based on the data (for 2018) provided by  
104 National Bureau of Statistics of China at  
105 <http://data.stats.gov.cn/easyquery.htm?cn=E0105>. The proportion of susceptible is  
106 50% of the total population. The rate of recovery  $\nu = 1/5$  per day. The basic  
107 reproductive number  $R_0$  does not directly used in the SEIR model. It has the following  
108 function with the model variables and parameters:  $R_0 = \beta/\nu \times S/N$ .

109 To make our analysis repeatable, we posted the data used in this study and R  
110 code for the SEIR model at <https://github.com/Xinhai-Li/2019-nCoV>.

### 111 3. Results

112 Until 9:00 on Feb. 9, the number of confirmed cases reaches 37251  
113 ([https://voice.baidu.com/act/newpneumonia/newpneumonia/?from=osari\\_pc\\_1](https://voice.baidu.com/act/newpneumonia/newpneumonia/?from=osari_pc_1)). In  
114 Hubei Province, the number of confirmed cases in the capital city Wuhan and other

115 prefecture-level cities grow exponentially; whereas in other cities in China, the  
116 number of infections increase linearly (Fig. 2).

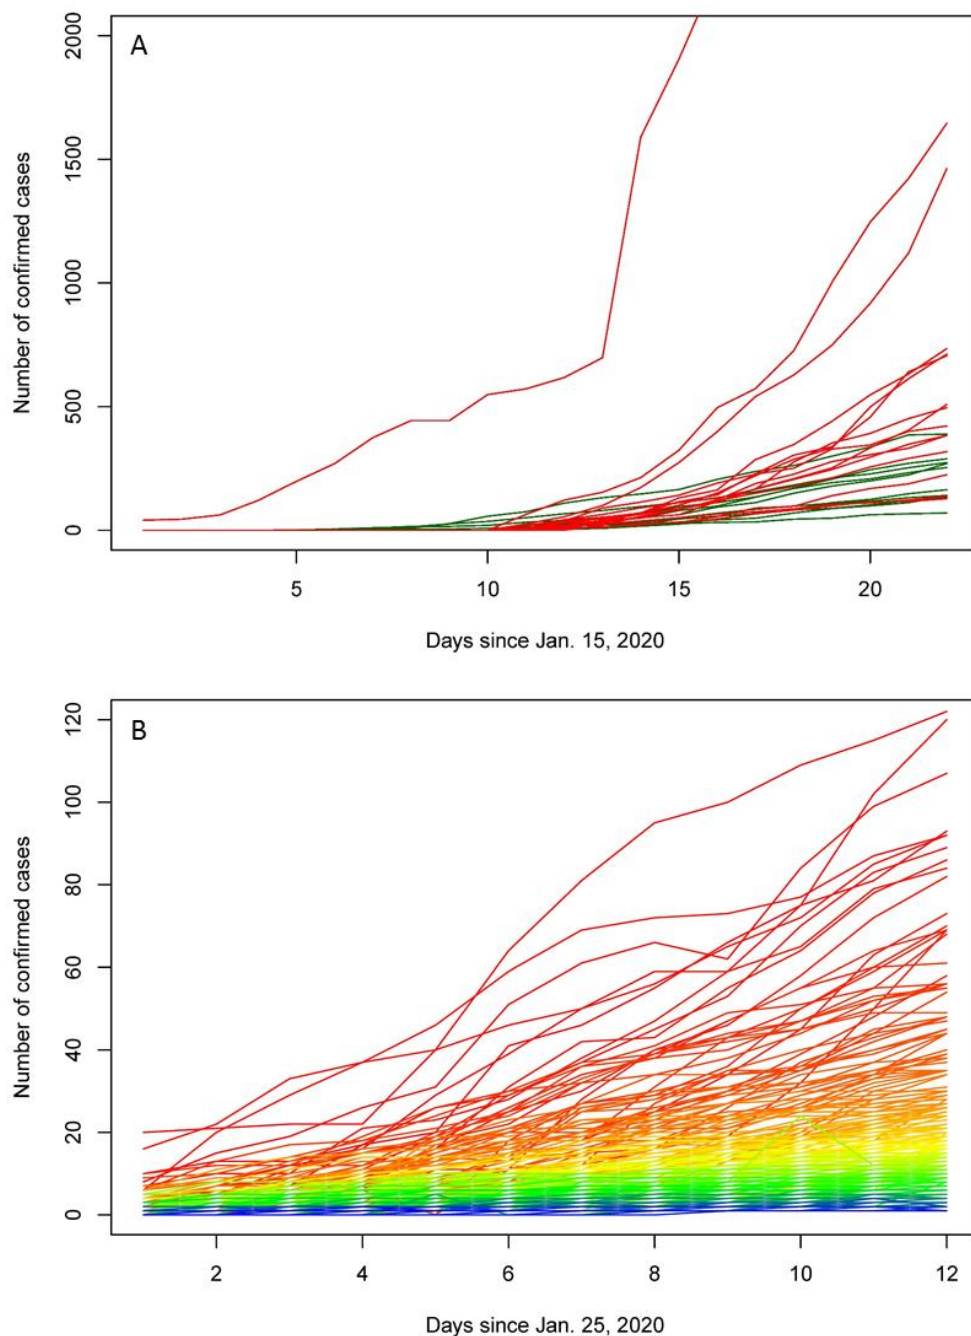

117 Fig. 2 The number of confirmed cases of 2019-nCoV in 332 cities in China. A. The  
118 number of cases in top 26 cities. The red lines show the numbers of cases in cities inside  
119 Hubei Province, and the green lines demonstrate those in other cities in China. B. The  
120 number of cases in other 306 cities.

121 We simulated the virus transmission process using the SEIR model and  
122 estimated the model parameters for Wuhan (Fig. 3) and Beijing (Fig. 4). For Wuhan,  
123 we first fit the number of confirmed cases (Fig. 3A), where the  $R_0$  is 5.75, much  
124 higher than that in most studies yet lower than Tang et al.'s result (Table 1). Due to  
125 the reality that a number of infected people in Hubei Province have not been checked  
126 (Leung et al. 2020; Read et al. 2020), we fit a more realistic transmission dynamics,  
127 under a condition of a fixed starting day on Dec. 1, 2019 (Fig. 3B). The best fit model  
128 having the  $R_0$  5.0. After the city closure on Jan. 23, the residents of Wuhan performed  
129 strong self-protection by isolating themselves at home, so that we halved basic  
130 reproductive number to 2.5, reflecting the pattern of family cluster infection of the  
131 virus. With this transmission rate, the infectious population could reach the peak of  
132 600,000 on March  $10 \pm 20$ , 2020. The warming climate, based on Equation 2, may  
133 shorten the transmission duration by 20-30 days (Fig. 3D).

134 For Beijing, about half of the infections were directly imported from Wuhan  
135 (Leung et al. 2020). We assume the infection flow would last for 30 days (from Jan.  
136 19 to Feb. 18), caused by the 10 million people leaving the returning Beijing for  
137 holidays. We simulated the numbers of imported cases and found the best fit of daily  
138 imported cases for the 30 days following a normal distribution, with mean value and  
139 SD to be  $19 \pm 12.7$  individuals / day. To estimate the fluctuation of this time series of  
140 imported cases, we calculated the standard deviation of the mean value (19  
141 individuals / day) of the daily imported patients from Jan. 19 to Feb. 8, which is 3.67.  
142 We adopted this uncertainty to run 200 simulation, and found the  $R_0$  1.4 is the perfect  
143 fit (Fig. 4A). Considering the uncertainty of  $R_0$ , we run the simulation with  $R_0 = 1.4 \pm$   
144  $0.21$  (CV = 15%, see Table 1), and the results indicate that the infectious population  
145 may reach 2651 on March  $31 \pm 16$  (Fig. 4B). The uncertainty of the transmission  
146 dynamics, as simulated by the SEIR model, is very high due to large variance in  
147 imported cases and  $R_0$  (Fig. 4).

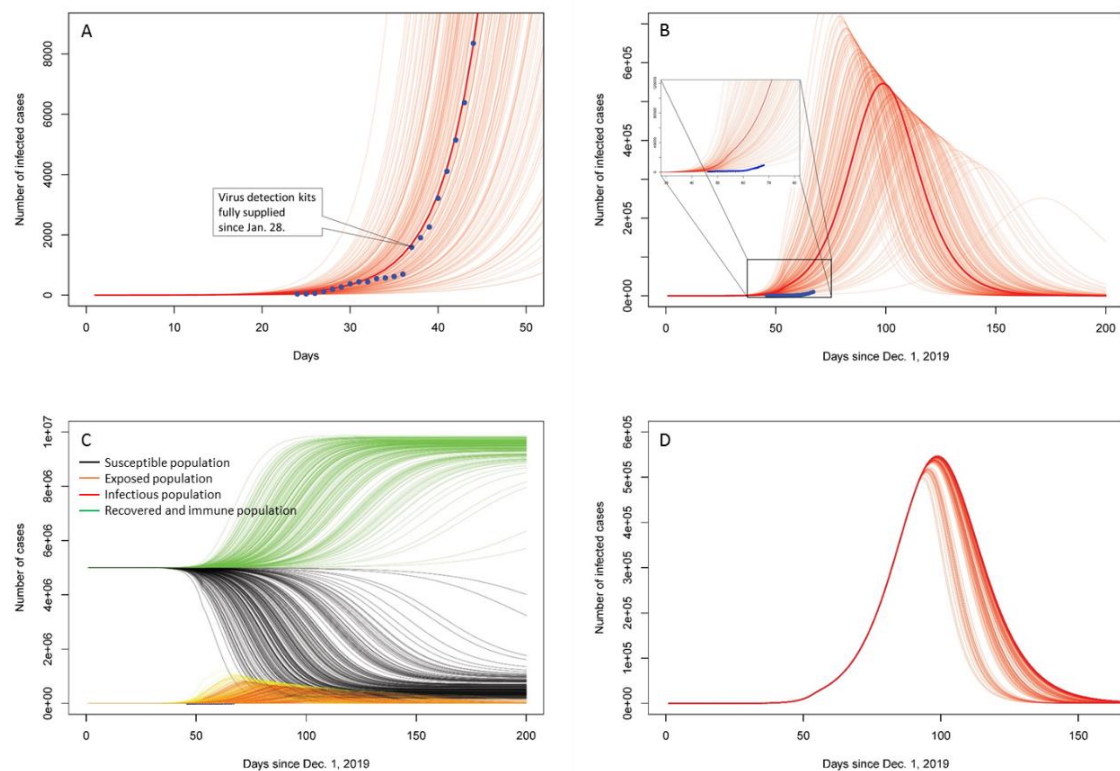

148 Fig. 3 Simulated 2019-nCoV transmission dynamics in Wuhan. The blue dots are number  
 149 of confirmed cases. The CV of  $R_0$  is 15% for 200 simulations. A. Fit SEIR model to the  
 150 published confirmed number of cases in Wuhan. The  $R_0$  is 5.75; the 2019-nCoV outbreak  
 151 started on Dec. 24, 2019. B. Fit SEIR model based on the “real” starting date on Dec. 1,  
 152 2019. The infectious population might reach 100,000 on Feb. 5, 2020. The  $R_0$  is 5 before  
 153 Jan. 23, and 2.5 after Jan. 23. C. The dynamics of susceptible, exposed, infectious and  
 154 recover/immune populations. Fig. 3B is a part of Fig. 3C. D. The dynamics of infectious  
 155 population under the effect of warning climate ( $C = 0.1$ ,  $SD = 0.03$ ).



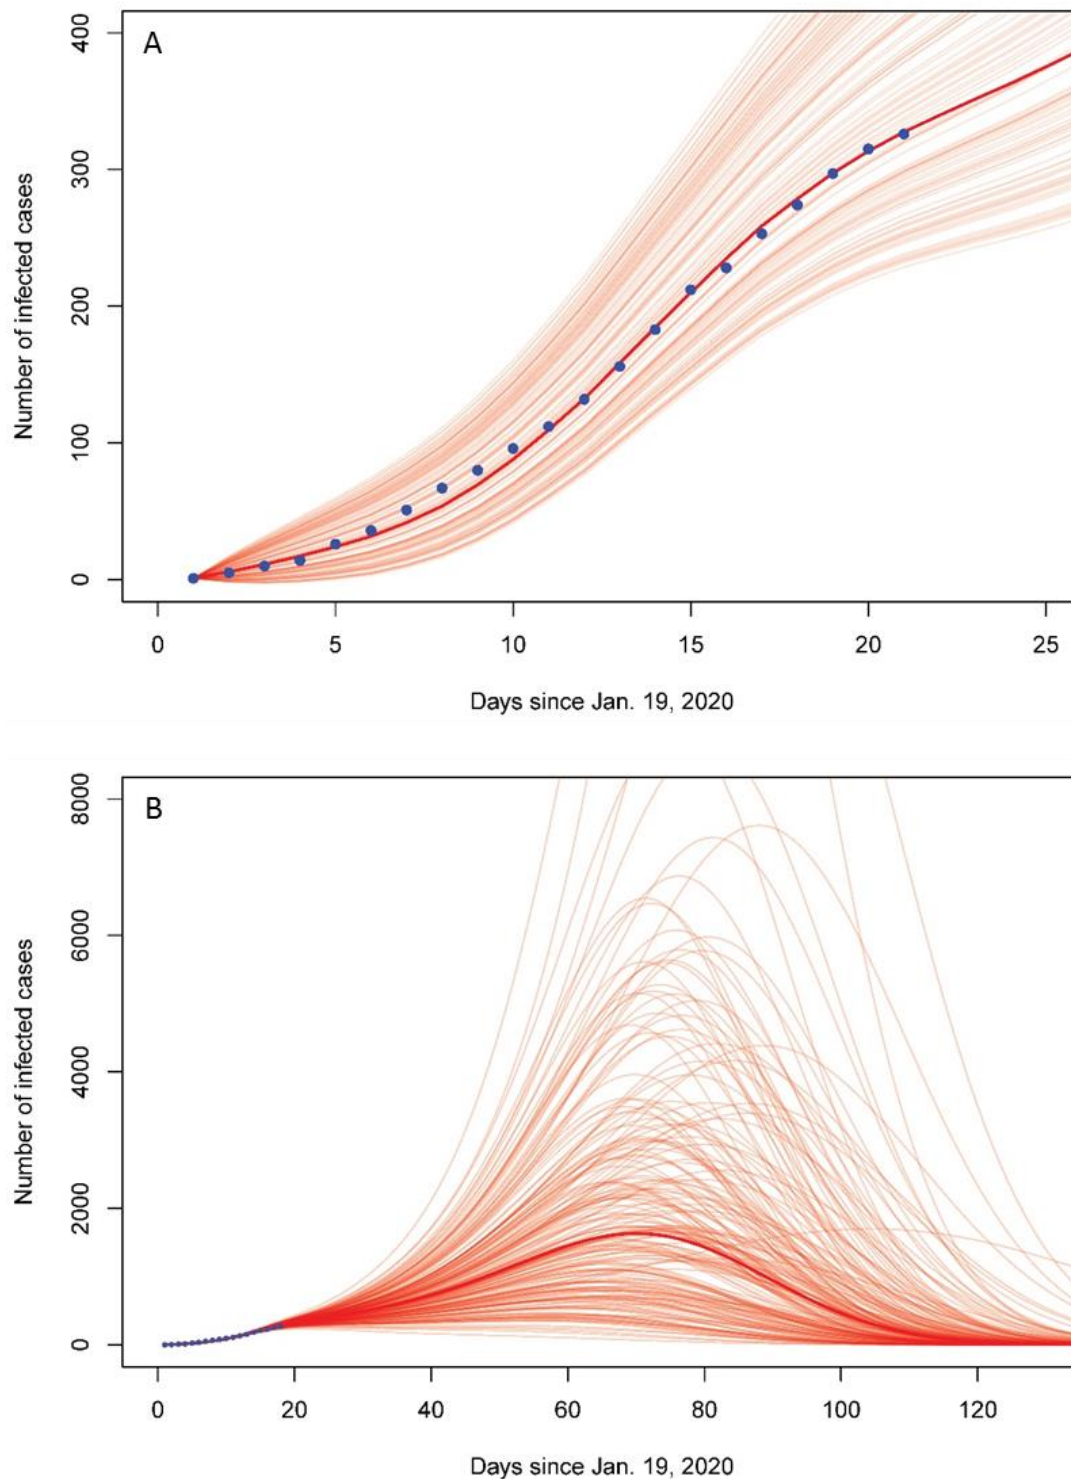

156 Fig. 4 Predicted infectious population of 2019-nCoV in Beijing using SEIR. A. Predicted  
157 infectious population at the early stage of transmission. The mean imported cases of  
158 infection is 19 persons / day for 30 days, and the standard deviation of this mean value is  
159 3.67. The  $R_0$  is fixed at 1.4. B. Predicted infectious population at the whole transmission  
160 period. The  $R_0$  is simulated at  $1.4 \pm 0.21$ . The parameter C (for temperature effect) in  
161 Equation 3 is 0.001.

#### 162 4. Discussion

163 We simulated the transmission dynamics of 2019-nCoV, with taking into account of  
164 the strict control measures enforced in the two cities. For Wuhan, city closure was a  
165 chock upon the local residents and they took much better protection than before.  
166 Accordingly, we halved the  $R_0$  after the city closure. As to Beijing, strict control  
167 measures have been implemented. As a result, the local infection happened only 41  
168 times until Feb. 3, with 124 people infected, which equals to half of the confirmed  
169 cases (He 2020). The dynamics of virus transmission are dramatically different within  
170 and without Hubei Province (Fig. 2), so that we gave different model parameters for  
171 the two cities. Our results about infectious population in Wuhan is lower than Read et  
172 al.'s estimation by 60%. Our estimation for Beijing is also much lower than the  
173 prediction of other studies (e.g. Leung et al. 2020; Read et al. 2020). We believe we  
174 provide a more realistic forecast, as we are witnessing the strict prevention activities  
175 carried out by all organizations and local communities in Beijing, and the linear  
176 increase (not exponential increase) of daily confirmed cases has proved the  
177 effectiveness of control measures.

178 China is running an antivirus campaign against 2019-nCoV. Besides the  
179 lockdown of Hubei Province, many cities blocked the highway and stopped the traffic  
180 through their domain. The longest vacation (for Chinese New Year) had been  
181 extended twice. The majority of people quarantine themselves at home for 14 days  
182 after travel. All domestic and international tourism were cancelled and banned.  
183 Numerous meetings, games, shows have been postponed. Schools are still closed.

184 There are three difficulties in the antivirus campaign. 1. The incubation period  
185 of 2019-nCoV is long. 2. Some patients have no symptoms yet they are infectious.  
186 Although a case of no symptom transmission (Rothe et al. 2020) had been proved  
187 flaw (Kupferschmidt 2020b), more other cases had been reported in many sources  
188 such as newspapers, website, and Wechat, etc. The current prevention method, body  
189 temperature checking, could not detect such people. 3. The false negative rate of  
190 2019-nCoV diagnosis is high. For example, Dr. Wenliang Li (WHO Twitter mourned  
191 his death due to 2019-nCoV on Feb. 6, 2020) had mentioned at his Wechat account  
192 that the nucleic acid detection for him was negative, when he suffered breath

193 difficulty. We think it would have a longer fight (Fig. 3 & 4) against 2019-nCoV than  
194 SARS and MERS.

195 Wuhan can represent the situation of other cities in Hubei Province. After the  
196 lockdown, these cities are isolated. Even over ten thousand medical workers from  
197 other cities all over China have entered Wuhan for help, the infectious population is  
198 still too large to be taken care of. However, starting from Feb. 2 and Feb. 8, two newly  
199 established hospitals (Huoshenshan and Leishenshan Hospitals) with altogether 2500  
200 beds for infectious patients have been already in service. With square bay hospitals  
201 having been built and coming into use, and a door to door checking of all residents in  
202 Wuhan started, and all infected and suspected people in Wuhan would be under  
203 medical care. The infectious population in Wuhan should be much lower than our  
204 estimation under the new prevention activity.

205 Beijing is a representative of other large cities outside Hubei Province in China.  
206 In Beijing, all confirmed and suspected cases have been taken into designated  
207 hospitals, with their close contactors being tracked and quarantined in hotels or at  
208 home. Similar controls are being implemented in other Chinese cities. The linear  
209 increases of total number of confirmed cases (Fig. 2) indicates the spread of the virus  
210 is under strictly control. The lockdown of Hubei Province substantially decreased the  
211 imported infections, ensure the situation under control outside the province.

212 We kept the parameters of incubation period and serial interval constant for all  
213 simulations. The uncertainty of these parameters also influences the results. The  
214 estimation of  $R_0$ , its variance, and the rate of susceptible population, as well as the  
215 effect of control measures and warming climate, are relatively arbitrary. In spite of the  
216 weakness, we provide a more accurate estimation than previous studies. We hope our  
217 results are valuable for instructing further antivirus activities.

## 218 **References**

- 219 Backer JA, Klinkenberg D, Wallinga J. 2020. The incubation period of 2019-nCoV  
220 infections among travellers from Wuhan, China. medRxiv.  
221 Doyle A, Bonmarin I, Levy-Bruhl D, Le Strat Y, Desenclos JC. 2006. Influenza  
222 pandemic preparedness in France: modelling the impact of interventions.  
223 *Journal of Epidemiology and Community Health* **60**:399-404.

- 224 Fang L-Q, et al. 2012. Distribution and risk factors of 2009 pandemic influenza A  
225 (H1N1) in mainland china. *American Journal of Epidemiology* **175**:890-897.
- 226 He X. 2020. The local infection of novel coronavirus in Beijing Beijing Business  
227 Newspaper, Beijing, Feb. 3, 2020.
- 228 Hethcote HW. 2000. The mathematics of infectious diseases. *Siam Review* **42**:599-653.
- 229 Kamigaki T, Oshitani H. 2010. Influenza pandemic preparedness and severity  
230 assessment of pandemic (H1N1) 2009 in South-east Asia. *Public Health* **124**:5-  
231 9.
- 232 Kupferschmidt K. 2020a. Outbreak of virus from China declared global emergency.  
233 *Science*.
- 234 Kupferschmidt K. 2020b. Study claiming new coronavirus can be transmitted by people  
235 without symptoms was flawed. *Science*.
- 236 Leung K, Wu J, Leung G. 2020. Nowcasting and forecasting the Wuhan 2019-nCoV  
237 outbreak. Preprint published by the School of Public Health of the University  
238 of Hong Kong.
- 239 Liu T, Hu J, Kang M, Lin L, Zhong H, Xiao J, He G, Song T, Huang Q, Rong Z. 2020.  
240 Transmission dynamics of 2019 novel coronavirus (2019-nCoV). *bioRxiv*.
- 241 Read JM, Bridgen JR, Cummings DA, Ho A, Jewell CP. 2020. Novel coronavirus 2019-  
242 nCoV: early estimation of epidemiological parameters and epidemic predictions.  
243 *medRxiv*.
- 244 Rothe C, Schunk M, Sothmann P, Bretzel G, Froeschl G, Wallrauch C, Zimmer T, Thiel  
245 V, Janke C, Guggemos W. 2020. Transmission of 2019-nCoV Infection from  
246 an Asymptomatic Contact in Germany. *New England Journal of Medicine*.
- 247 Shetty P. 2009. Preparation for a pandemic: influenza A H1N1. *Lancet Infectious  
248 Diseases* **9**:339-340.
- 249 Tang B, Wang X, Li Q, Bragazzi NL, Tang S, Xiao Y, Wu J. 2020. Estimation of the  
250 transmission risk of 2019-ncov and its implication for public health  
251 interventions. Available at SSRN 3525558.
- 252 Tarantola D, Amon J, Zwi A, Gruskin S, Gostin L. 2009. H1N1, public health security,  
253 bioethics, and human rights. *Lancet* **373**:2107-2108.
- 254 Van Kerkhove MD, et al. 2010. Studies needed to address public health challenges of  
255 the 2009 H1N1 influenza pandemic: insights from modeling. *Plos Medicine* **7**.
- 256 WHO. 2020. Q&A on coronaviruses: How long is the incubation period?, Available  
257 from <https://www.who.int/news-room/q-a-detail/q-a-coronaviruses> (accessed  
258 2020-2-5).
- 259 Zhao S, et al. 2020. Preliminary estimation of the basic reproduction number of novel  
260 coronavirus (2019-nCoV) in China, from 2019 to 2020: A data-driven analysis  
261 in the early phase of the outbreak. *International Journal of Infectious Diseases*.
